# A unified physiological framework of transitions between seizures, sustained ictal activity and depolarization block at the single neuron level

Short Title: Dynamics of pathologic behaviors at single neuron level

Damien Depannemaecker<sup>1,2,#a,\*</sup>, Anton Ivanov<sup>1</sup>, Davide Lillo<sup>1</sup>, Len Spek<sup>1,#b</sup>, Christophe Bernard<sup>1,¶</sup>, and Viktor Jirsa<sup>1,¶</sup>

<sup>1</sup>Aix Marseille Univ, INSERM, INS, Institut des Neurosciences des Systèmes, Marseille, France

<sup>2</sup>Disciplina de Neurociência, Departamento de Neurologia e Neurocirurgia, Universidade de Federal de São Paulo, São Paulo, Brazil.

<sup>#a</sup>actual addresses: Department of Integrative and Computational Neuroscience, Institut Neuro-PSI, CNRS, Gif-sur-Yvette, France

<sup>#b</sup>actual addresses: Department of Applied Mathematics, University of Twente, Enschede, The Netherlands

\*Corresponding author: damien.d@cnrs.fr

¶equally contributing last authors

## Abstract

The majority of seizures recorded in humans and experimental animal models can be described by a generic phenomenological mathematical model, The Epileptor. In this model, seizure-like events (SLEs) are driven by a slow variable and occur via saddle node (SN) and homoclinic bifurcations at seizure onset and offset, respectively. Here we investigated SLEs at the single cell level using a biophysically relevant neuron model including a slow/fast system of four equations. The two equations for the slow subsystem describe ion concentration variations and the two equations of the fast subsystem delineate the electrophysiological activities of the neuron. Using extracellular  $K^+$  as a slow variable, we report that SLEs with SN/homoclinic bifurcations can readily occur at the single cell level when extracellular  $K^+$  reaches a critical value. In patients and experimental models, seizures can also evolve into sustained ictal activity (SIA) and, depolarization block (DB), activities which are also parts of the dynamic repertoire of the Epileptor. Increasing extracellular concentration of  $K^+$  in the model to values found during experimental status epilepticus and DB, we show that SIA and DB can also occur at the single cell level. Thus, seizures, SIA and DB, which have been first identified as network events, can exist in a unified framework of a biophysical model at the single neuron level and exhibit similar dynamics as observed in the Epileptor.

## Author Summary

Epilepsy is a neurological disorder characterized by the occurrence of seizures. Seizures have been characterized in patients in experimental models at both macroscopic and microscopic scales using electrophysiological recordings. Experimental works allowed the establishment of a detailed taxonomy of seizures, which can be described by mathematical models. We can distinguish two main types of models. Phenomenological (generic) models have few parameters and variables and permit detailed dynamical studies often capturing a majority of activities observed in experimental conditions. But they also have abstract parameters, making biological interpretation difficult. Biophysical models, on the other hand, use a large number of variables and parameters due to the complexity of the biological systems they represent. Because of the multiplicity of solutions, it is difficult to extract general dynamical rules. In the present work, we integrate both approaches and reduce a detailed biophysical model to sufficiently low-dimensional equations, and thus maintaining the advantages of a generic model. We propose, at the single cell level, a unified framework of different pathological activities that are seizures, depolarization block, and sustained ictal activity.

## Introduction

Seizures are part of the repertoire of built-in activities of neuronal networks as they can be triggered in most brain regions from most species (Jirsa et al. 2014). Several conceptual frameworks have been proposed to explain seizure dynamics (Naze 2015; Naze et al. 2015; Soltesz and Staley 2008; Staley 2015; Stefanescu et al. 2012; Y. Wang et al. 2017; Wendling et al. 2016). The predominant framework assumes that the majority of seizure onsets and offsets correspond to bifurcations in the electrophysical variables (Jirsa et al. 2014; Saggio et al. 2017), although there exist other non-bifurcation types (Blenkinsop et al. 2012). This framework has been generalized by Saggio and colleagues (Saggio et al. 2017, 2020). A phenomenological mathematical model, called The Epileptor, describes the dynamics of a majority of seizures recorded in drug-resistant patients, and most seizures recorded in experimental models (Jirsa et al. 2014; Saggio et al. 2020). A qualitative analysis of the Epileptor reveals that seizures, SIA and DB co-exist, and that multiple types of transitions from one type of activity to the other are possible, as verified experimentally (El Houssaini et al. 2015; Houssaini et al. 2020; Saggio et al. 2017). Since it is phenomenological, the Epileptor model does not provide direct insight regarding underlying biophysical mechanisms. The phenomenological model imposes strong constraints in terms of dynamics. Numerous neuronal network models, including biophysically realistic ones, have been developed to study seizures, SIA or DB mechanisms (Holt and Netoff 2013; V.K. Jirsa et al. 2017; Kim and Nykamp 2017; Krishnan et al. 2015; Lytton 2008; Naze 2015; Proix et al. 2014; Stefanescu et al. 2012; Traub and Wong 1982). These models contain too many parameters and variables to perform a detailed bifurcation analysis, thus preventing bridging the gap between phenomenological and biophysical approaches. However, with the guidance of phenomenological modeling, design of neuronal spiking network including several biophysical features has been performed (Naze et al. 2015). In this work, transitions between states of the neuronal network are ensured by slow variable representing extracellular environmental fluctuation.

Although seizures and DB are generally observed at the neuronal network scale, their dynamical equivalence can be found at the single cell level (Bikson et al. 2003; Bragin et al. 1997; Chizhov et al. 2018; Cressman et al. 2009; Hübner and Dahlem 2014; Kager et al. 2000; Lietsche et al. 2016; McCormick and Contreras 2001), which can be used to study human epilepsy (Merricks et al. 2015; Tankus 2016; Truccolo et al. 2011). Moreover, previous works (Viktor K. Jirsa and Stefanescu 2011; Montbrió et al. 2015; Naze et al. 2015) show that dynamical features are preserved when going from the weakly coupled network to the single cell level. It therefore seems appropriate to consider a biophysical model at the single cell scale exhibiting dynamic properties identified in the generic model and in which the transitions between the different states are provided by a slow variable describing the variations within the extracellular milieu. Bursting activity in neurons can be described in terms of bifurcations (E. Izhikevich 2007; E. M. Izhikevich 2000), and different single cell biophysical models have been proposed, which can model SLE and DB, but not SIA (Barreto and Cressman 2011; Chizhov et al. 2018; Cressman et al. 2009; Hübner and Dahlem 2014; Kager et al. 2000; Øyehaug et al. 2012; Ullah and Schiff 2010; Y Wei et al. 2014; Yina Wei, Ullah, Ingram, et al. 2014), although, to the best of our knowledge, these activities have not been observed experimentally in isolated neurons. They are slow/fast systems, where a slow subsystem drives the fast subsystem between different states. In such models, the studied fast subsystem delineates the neuronal membrane electrophysiological activities. The slow subsystem can be represented by variations of different slow variables including ion concentration (Barreto and Cressman 2011; Chizhov et al. 2018; Cressman et al. 2009; Hübner and Dahlem 2014; Kager et al. 2000; Øyehaug et al. 2012; Y Wei et al. 2014; Yina Wei, Ullah, Ingram, et al. 2014), oxygen level (Yina Wei, Ullah, and Schiff 2014; Yina Wei, Ullah, Ingram, et al. 2014), volume (Øyehaug et al. 2012; Y Wei et al. 2014) and interaction with glial cells (Hübner and Dahlem 2014; Øyehaug et al. 2012). These models provide mechanistic insights, in particular how the slow variable influences neuronal activity, including the transitions from “healthy” regimes to “pathological” ones like SLEs and DB. However, none of these models, including the extracellular slow variations, could be reduced to four variables, while presenting a bursting

pattern corresponding to the most common ones encountered at the network level, i.e. the SN/homoclinic pair (Jirsa et al. 2014). The reduction of a model to a small number of dimensions while maintaining the link with physical quantities, makes it possible to establish a direct link between biophysics and a simple dynamical description. Since SLEs, SIA and DB pertain to the dynamic repertoire of The Epileptor and of biological neuronal networks (El Houssaini et al. 2015; Saggio et al. 2017), biophysical models should be able to reproduce all three types of activities. The goal of the present study is to identify candidate mechanisms from physiology robustly leading to the time scale separation and trajectories in SLEs. We will take guidance from the careful dynamic analyses performed in previous works.

In generic models, the dynamics is well understood (Jirsa et al. 2014; Saggio et al. 2017) but these models rarely offer direct biophysical insight as they use abstract parameters. Important works have been done to understand the link between phenomenological and biophysical models (Bernard et al. 2014; Naze et al. 2015). In order to explore the dynamics repertoire, the high dimensionality of detailed biophysical models must be reduced. A minimal model of interictal and SLEs has been introduced as Epileptor-2, using increase in  $[K]_o$  to trigger burst discharges and restoration of the  $K^+$  gradient via the sodium-potassium pump to stop SLEs (Chizhov et al. 2018). The work of Saggio et al. (Saggio et al. 2017) is a generalization of the dynamics found in Epileptor and Epileptor-2. However, Epileptor-2 does not produce the SN/homoclinic bifurcation consistently found experimentally, and the model does not generate SIA or DB. Moreover, when the fast discharges stop, the slow variables of Epileptor-2 continue oscillating, whereas that of Epileptor 1 do not. This can be understood on the basis of the results of Saggio et al. (Saggio et al. 2017). In the present reduction, we used a Hodgkin-Huxley-like single cell model, and we imposed several constraints: SLE, SIA and DB (El Houssaini et al. 2015), as well as the SN/homoclinic bifurcation must be present. We have thus generated a reduced slow/fast system preserving biophysical representation and satisfying these constraints. A variable acting on a slow time scale is necessary to drive the system through different activities (e.g. from SLE to DB). In a cell, numerous processes can occur on

a slow time scale and act as a slow variable, including changes in ion concentration, metabolism, phosphorylation levels, and transcription. Ion homeostasis regulation is critical to maintaining neuron function, and many sub-cellular mechanisms are involved in this process (Dubyak 2004). Fluctuations of ion concentrations in the extracellular space modulate the electrophysiological activity of a single neuron (Cressman et al. 2009; Yina Wei, Ullah, and Schiff 2014). The present work focuses on extracellular potassium ( $[K]_o$ ) concentration because it increases during seizures (de Curtis et al. 2018; Fisher et al. 1976; Fröhlich et al. 2008; Lux et al. 1986; L. Wang et al. 2016), even in the absence of synaptic activities (de Almeida et al. 2008; Jefferys and Haas 1982). Augmentation of  $[K]_o$  is also observed in head injury (Katayama et al. 1990; Reinert et al. 2000), which can be a starting point for epilepsy (Lowenstein 2009). Computational simulations show that potassium could be responsible for local synchronization (Durand et al. 2010) and is an important parameter in neural dynamics (Barreto and Cressman 2011; Cressman et al. 2009; Ullah and Schiff 2010; Yina Wei, Ullah, and Schiff 2014). In addition, in experimental models, the transition to DB correlates with a much larger increase of  $[K]_o$  as compared to SLEs (El Houssaini et al. 2015; Gloveli et al. 1995). We here consider the slow modulatory effects of  $[K]_o$  variations. In our model, the slow sub-system describes ionic concentration variations. The fast subsystem characterizes the dynamics of trans-membrane ion flows through voltage-gated and the sodium-potassium pump, and so allows tracing the membrane potential. We report that this single cell model accounts for the SN/homoclinic bifurcation pair and that it reproduces SLEs, SIA and DB, reproducing patterns found in single neurons recorded experimentally during seizures.

## Results

Our goal was to construct a biophysical model at single neuron level that can reproduce the different firing patterns recorded when extracellular potassium is experimentally increased, while keeping it sufficiently simple to allow a bifurcation analysis. The model is schematized in Fig.1 (see methods section for the equations). It is a simplification of the classical Hodgkin-

Huxley formalism, which also includes close surrounding environment thanks to a description of three compartments (external bath, extracellular space, intracellular space).

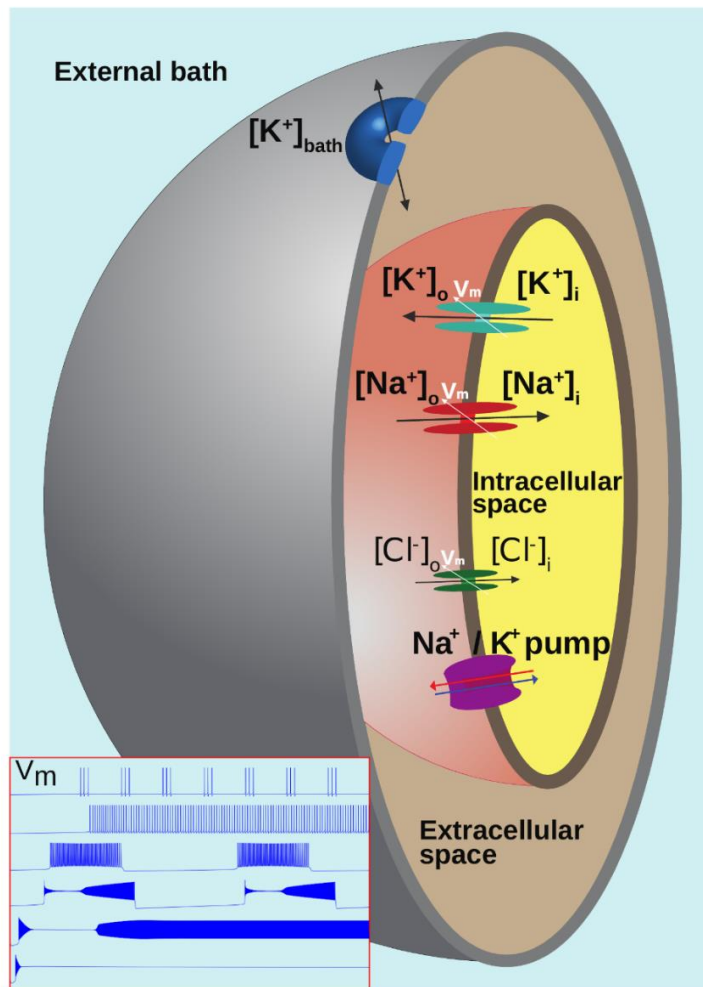

**Figure 1: Diagram of characteristics and mechanisms described by the model.** Three compartments are represented. A passive diffusion of potassium exists between the external bath and the extracellular space. Na<sup>+</sup>, K<sup>+</sup> and Cl<sup>-</sup> ions can be exchanged between the extracellular and intracellular compartments via the Na/K-pump and voltage-gated channels. This model can reproduce the typical patterns of the membrane potential  $V_m$ , shown in the bottom left subplot, including tonic firing, bursting, seizure like events (SLE), sustained ictal activity (SIA) and depolarization block (DB).

Numerous experiments show that seizures and SLEs are associated with an increase in  $[K^+]_o$  (Fisher et al. 1976; Fröhlich et al. 2008) and that increasing of external  $[K]$  can trigger SLEs (S. F. Traynelis and Dingledine 1988; Stephen F. Traynelis and Dingledine 1989). The model presented here takes into account the regulation of potassium, via the possible diffusion towards the external bath compartment and its associated potassium concentration  $[K]_{bath}$ .



Changing  $[K]_{\text{bath}}$  parameter will strongly influence the regulation of extracellular potassium by allowing or not the removal of excess potassium from the extracellular compartment. When  $[K]_{\text{bath}}$  is low, the bath compartment can pump out the extracellular potassium; but it fails to do so when it is saturated by potassium. We thus explored the response of the model as the concentration of  $[K]_{\text{bath}}$  was increased. The gradual increase in potassium led to 7 sequential qualitative firing patterns: Resting State (RS), Spike Train (ST), Tonic Spiking (TS), Bursting, Seizure-like events (SLE), Sustained Ictal Activity (SIA), and Depolarization Block (DB) (Note that what is called here Spike Train also corresponds to another type of burster from a dynamical point of view (E. Izhikevich 2007; Saggio et al. 2017)). The corresponding changes of membrane potential for all these patterns are shown in Fig.2.

The number of firing patterns is higher than in the original Hodgkin-Huxley model. This is due to the fact that the model takes into account the variations of concentration, as evidenced by the variation of the Nernst potentials. The changes in Nernst potentials for sodium and potassium ion species are shown in Fig.2. The simulations are initialized with values observed in a "healthy" resting situation, it is therefore possible to observe the transition linked to the increase in the parameter  $[K]_{\text{bath}}$ . In some cases, the Nernst potentials display a transient change before reaching a sustain low amplitude oscillations following action potentials, as observed during RS, TS, SIA and DB. During periodic events, (ST, Bursting, SLE), larger oscillations are observed in Nernst potentials. These oscillations are directly linked to the observed oscillations in the slow variables of the model (Eq.(3) and Eq.(4)) describing concentration changes. The rate of oscillation of the slow variables thus explain the duration of periodic events, in line with the assumed essential role of ionic homeostatic regulation.

Each of the firing patterns can be associated to a different behavior, observable experimentally at different scales. The correspondence is established on the basis of their shape and their order of appearance as  $[K]_{\text{bath}}$  is increased. Tonic and bursting patterns are prototypical. We consider the activity shown on Fig. 2d as SLE at the neuronal scale, as it is similar to the activity typically recorded in individual neurons (Haglund and Schwartzkroin



1990), in particular the transient episode of depolarization block, in different experimental preparations during SLEs at the network scale (e.g. Fig. 6 in (Uva et al. 2013); Fig. 1 in (Bikson et al. 2003) or Fig. 8 in (Jirsa et al. 2014)). Although it is possible to generate SIA *in vitro* (Quilichini et al. 2002), the corresponding intracellular activity is not known, however the sustained firing pattern in the model cell resembles the regular field activity recorded during status epilepticus like events *in vitro* (Quilichini et al. 2002). The sustained DB at the single cell level corresponds to what is observed experimentally during network spreading depolarization when  $[K]_o$  reaches high levels (G G Somjen 2001).

Increasing  $[K]_{bath}$  leads to different regimes of variation of external potassium (Fig.3). These different regimes are associated with a specific dynamic (i.e. type of bifurcation) of the excitability of the membrane. It is therefore possible to link the membrane potential to the variations in extracellular potassium, because of exchanges existing between compartments (i.e. via the slow variable), as shown in Fig.4. In the next subsection, we detailed these dynamical interactions for the different patterns of activity, following the order of appearance when  $[K]_{bath}$  increase.

244

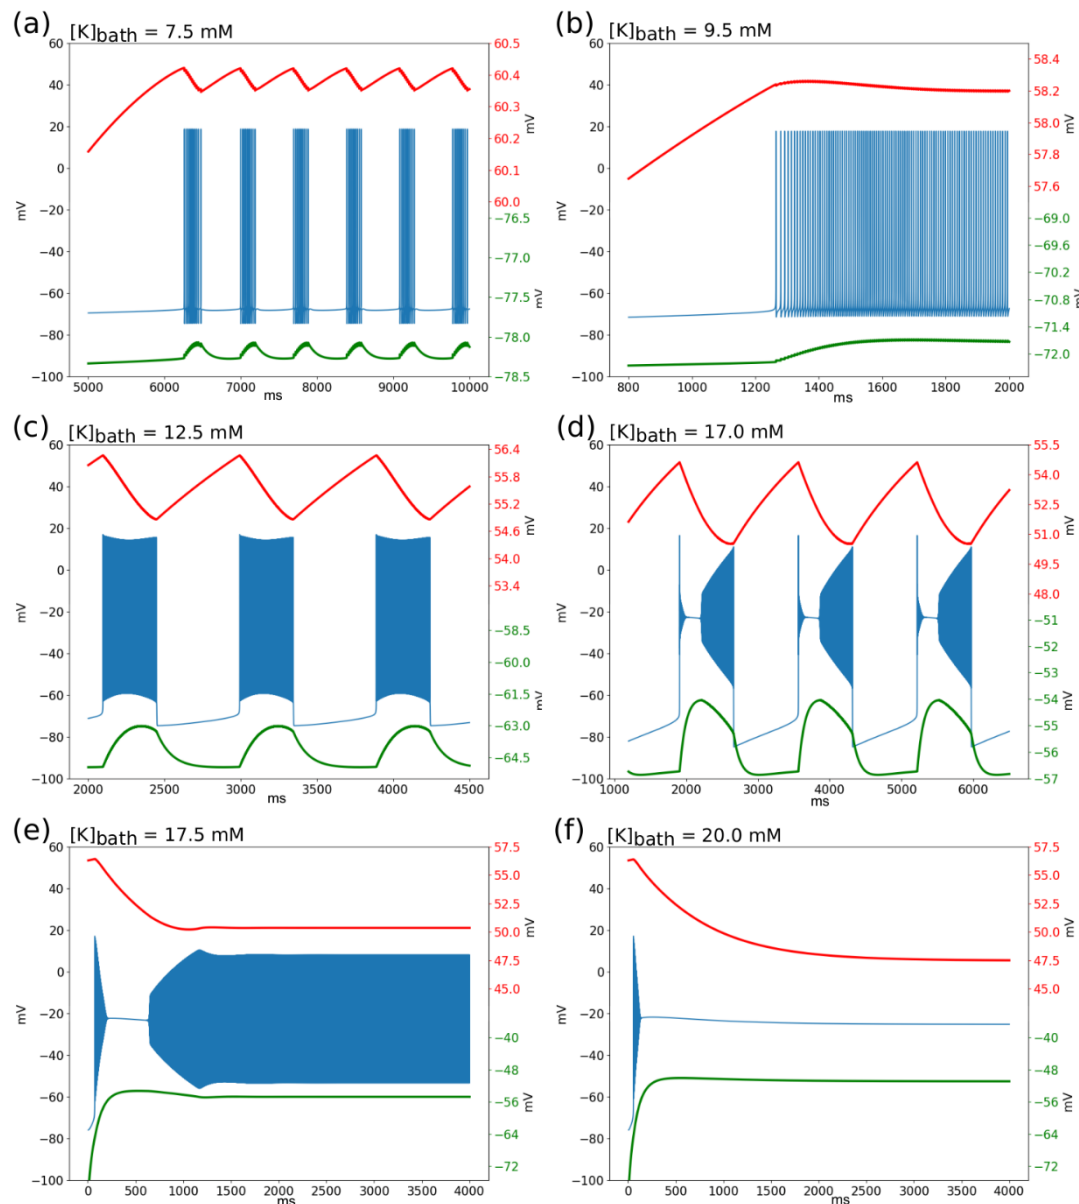

**Figure 2: qualitative mode of behavior of the membrane potential and Nernst potentials.**

In blue: time series of the membrane potential  $V_m$  for the following patterns of activity: (a) Spike train, (b) Tonic spiking (TS), (c) Bursting, (d) Seizure-like event (SLE), (e) sustained ictal activity, (f) Depolarization Block (DB). In red: Nernst potential of sodium, in green: Nernst potential of potassium with specific Y axis on the right side. If the value of  $[K]_{bath}$  stays below 6 mM, the system remains in resting state around -72 mV. Specific patterns of activities start to appear with a diminution of the Nernst potential of sodium and an increase of the Nernst potential of potassium. When periodic events are occurring (panels c and d), oscillations can also be observed in the Nernst potential of both ions.

## Resting states, spike train and tonic spiking in low $[K]_{\text{bath}}$

Resting state is found when  $[K]_{\text{bath}}$  is around the normal value of  $[K]_o$  (called  $[K]_{o,o}$ , see Methods section). If  $[K]_{\text{bath}}$  is smaller than  $[K]_{o,o}$  the membrane potential slowly hyperpolarizes, due to a diffusion of potassium in the direction of the external bath. When  $[K]_{\text{bath}}$  slightly increases ( $> 7$  mM), ST appears through a SNIC bifurcation. The offset is also a SNIC bifurcation. In this case, the onset and offset bifurcations can be easily identified by their characteristic features (Saggio et al. 2017), and confirmed by numerical methods (using SymPy (Meurer et al. 2017) and SciPy (Millman and Aivazis 2011) libraries). With higher value of  $[K]_{\text{bath}}$  ( $> 8$  mM), TS occurs. In this condition,  $[K]_o$  stabilizes (Fig.3), and the neuron fires at a constant frequency (Fig. 2b). The occurrence of regular spiking due to an increase of  $[K]_o$  through diffusion from the bath is consistent with experiments [29].

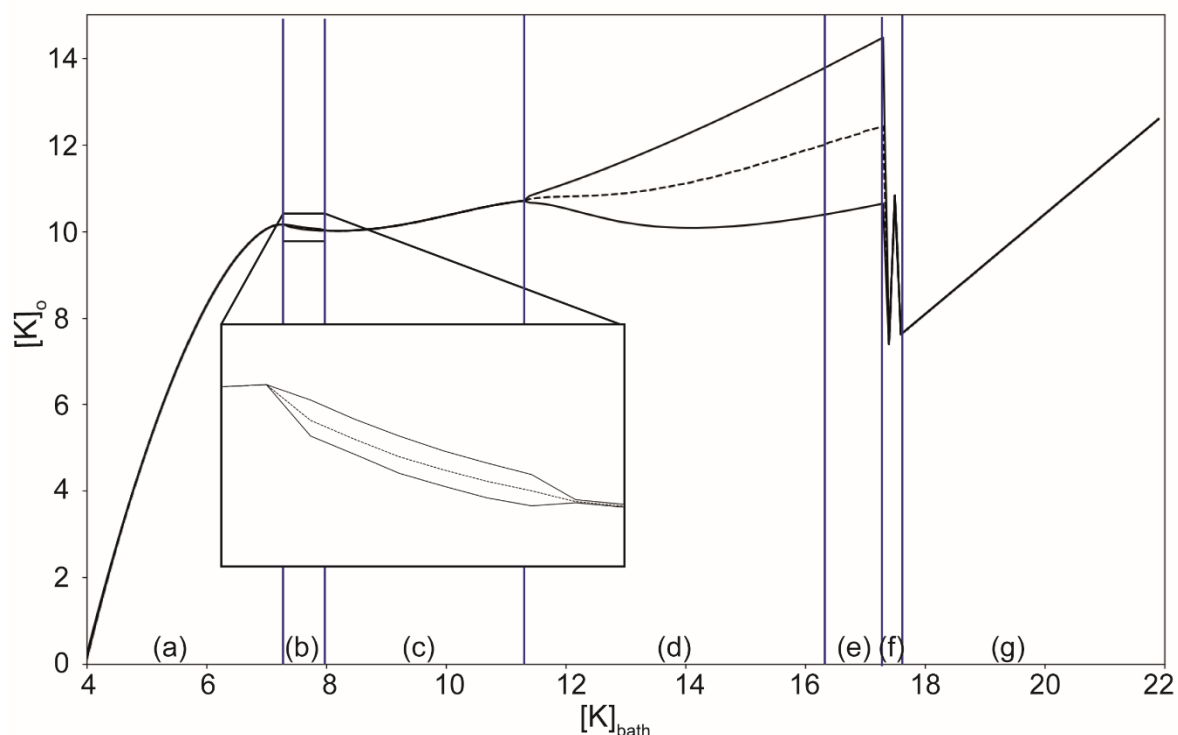

**Figure 3: Variation of extracellular potassium concentration as a function of  $[K]_{\text{bath}}$ .** Minimal and maximal external potassium  $[K]_o$  and mean (dash line) concentration observed during simulations done for different values of the parameter  $[K]_{\text{bath}}$ . Due to diffusion from the external bath, increasing  $[K]_{\text{bath}}$  leads to variations in  $[K]_o$ . Different patterns are observed for each range of  $[K]_{\text{bath}}$ : (a) resting state, (b) spike train, (c) regular spiking, (d) burst, (e) seizure like event, (f) sustained ictal activity, (g) depolarization block. The periodic events (spike train, burst and seizure-like event) correspond to the range of  $[K]_{\text{bath}}$  where  $[K]_o$  periodically oscillates.

## Bursting and Seizure-like events

Bi-stable behavior occurs when the slow system starts to oscillate when  $[K]_{\text{bath}}$  is further increased. The model (with parameters listed in Table 1) displays bursting and SLE, successively. Bursts are square-wave bursts (SN/Homoclinic bifurcations) and SLEs also show SN and Homoclinic bifurcations at onset and offset, respectively (See supplementary information: S1, S2, S3, S4). Here, the slow subsystem oscillates in a self-sustained manner (Fig. 4a-f), generating recurrent bursting or SLEs, with important variations of  $[K]_o$ , due to oscillations in the slow subsystem. The combined effects of oscillations of  $\Delta[K]_i$  and  $[K]_g$  explain the changes in the Nernst potential of potassium (and sodium, which is linked to potassium in the model), thus changing neural excitability. During spiking activity, voltage-gated potassium channels open increasing potassium current  $I_K$ . The influence of  $I_K$  in the equation of  $\Delta[K]_i$  (eq.3), explains the decrease of  $\Delta[K]_i$ , hence the increase of  $[K]_o$  through equations (eq.16) and (eq.20). This is consistent with the observations described in (Fisher et al. 1976). The increase in  $[K]_o$  starts with the occurrence of burst and SLEs. Thus, it is not the cause of the event but a consequence of homeostasis dysregulation (i.e. augmentation of  $[K]_{\text{bath}}$ ).

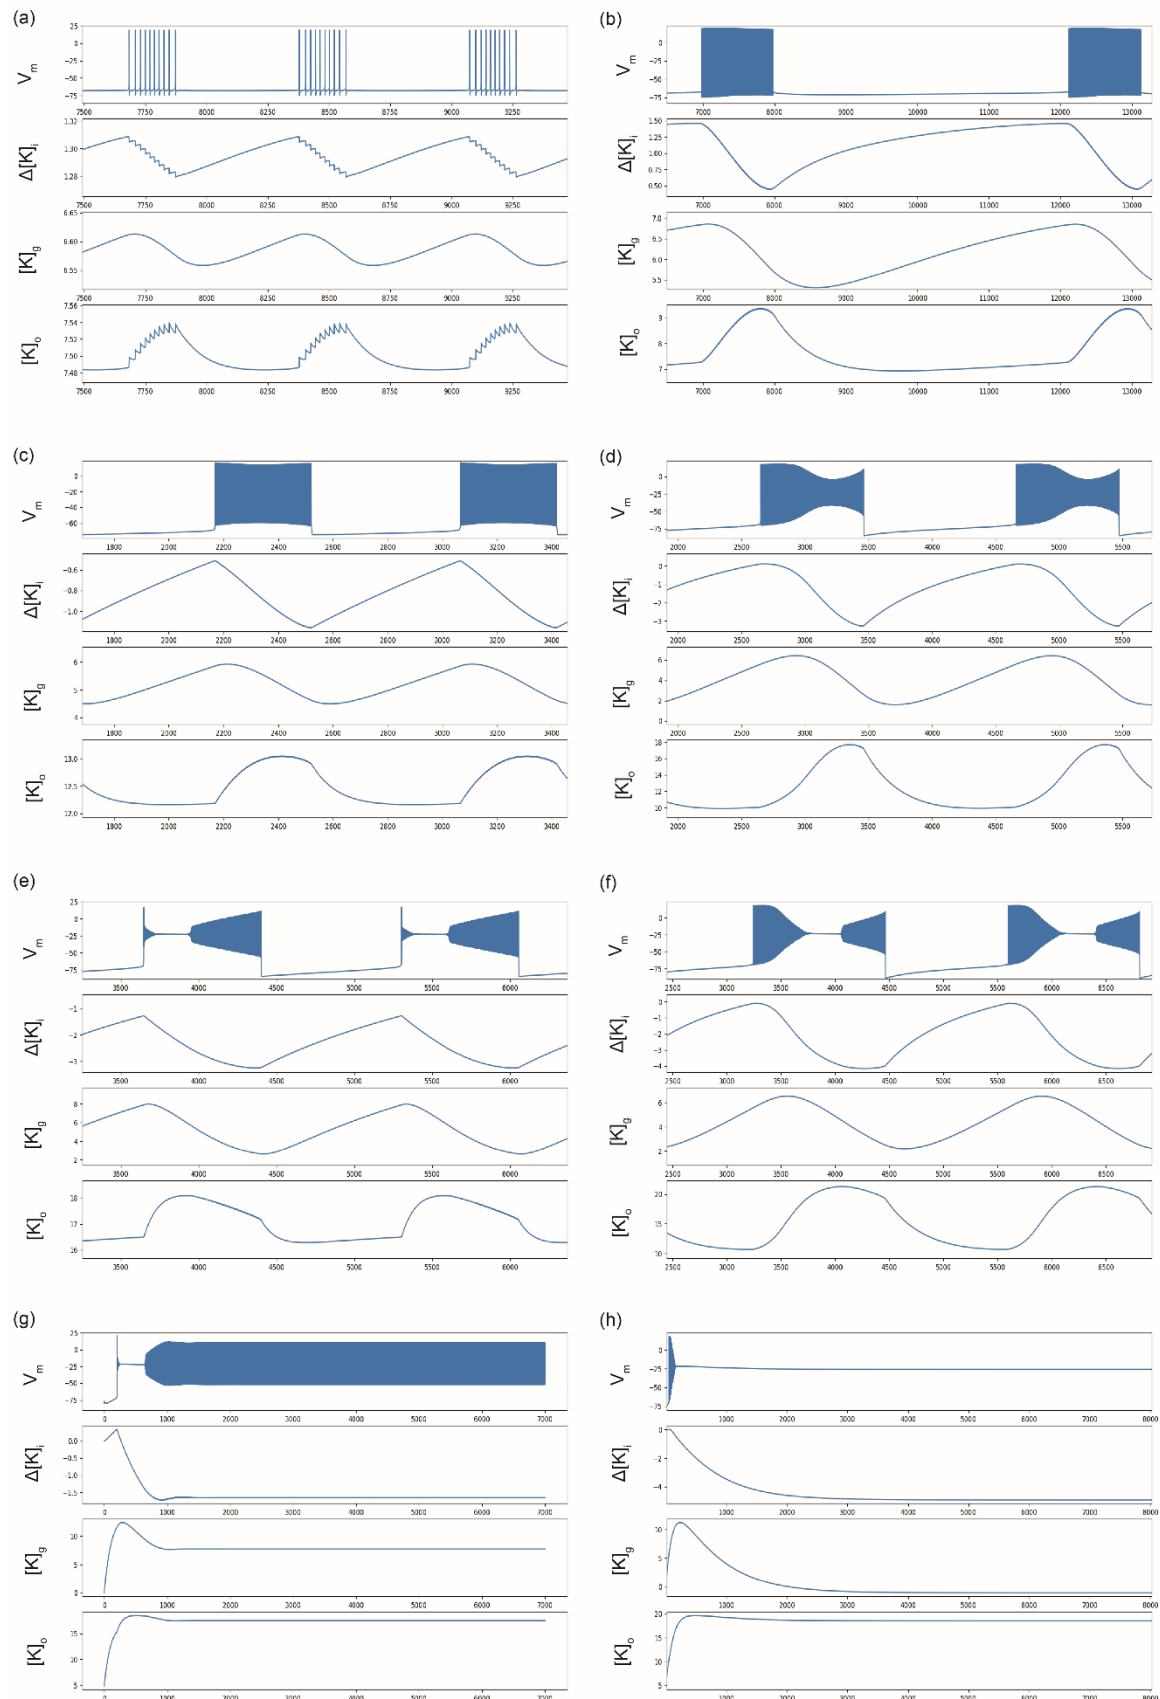

**Figure 4: Time series of membrane potential,  $\Delta[K]_i$ ,  $[K]_g$ , and  $[K]_o$ .** obtained thanks to numerical methods using SciPy library (Millman and Aivazis 2011), x-axis in millisecond. (a) spike train with  $[K]_{bath} = 7.5$  mM, (b) spike train with  $[K]_{bath} = 7.5$  mM and  $\gamma = 0.04$ ,  $\epsilon = 0.002$ , (c) Burst with  $[K]_{bath} = 12.5$  mM, (d) Burst with  $[K]_{bath} = 12.5$  mM, and  $\gamma = 0.06$ ,  $\epsilon = 0.002$ , (e) SLE with  $[K]_{bath} = 16$  mM, (f) SLE with  $[K]_{bath} = 16$  mM and  $\gamma = 0.08$ ,  $\epsilon = 0.0008$ , (g) SIA with  $[K]_{bath} = 17.5$  mM, (h) DB with  $[K]_{bath} = 20$  mM. If not specified, the parameter values used here are the reference parameters described in the method section. Variations of  $\Delta[K]_i$  and  $[K]_g$  induce different patterns of activity. The combined effects lead to the observed variations in  $[K]_o$ . The time scale of the slow variables  $\gamma$  and  $\epsilon$  influence the shape of  $V_m$  allowing the system to exhibit SN or SNIC bifurcation at the onset of the events.

### Steady states, SIA events and DB, in high $[K]_{bath}$ conditions

SIA events (Fig. 2g) appears for  $[K]_{bath}$  around 17.5 mM (Figs. 3 & 4), i.e. above the threshold value for SLEs as reported experimentally (El Houssaini et al. 2015). If no other mechanisms act to stop it, these oscillations remain constant (analogous to refractory status epilepticus). Permanent DB occurs for even higher values of  $[K]_{bath}$  ( $> 18.0$  mM, Fig. 3) as also reported experimentally (El Houssaini et al. 2015). In these cases, after a peak value (Fig. 4h),  $[K]_o$  stabilizes, explaining the short range of variation (Fig. 3). These steady-states start like a SLEs (Fig. 4e-f), then the slow variables stabilize and  $[K]_o$  remains constant at a high value (Figs. 4g-h).

We conclude that the model behaves as expected from the biological observations, when experimentally increasing of  $[K]_{bath}$ . These simulations were obtained when using a “healthy” situation, i.e. as if recording a “control” neuron. In the next section, we model a “pathological” situation for which where the regulatory mechanisms of neuronal homeostasis are affected.

### Influence of other parameters

We then aimed to identify relevant parameters that could describe “healthy” and “pathological” states. Experimental data show that impairment in potassium buffering by glial cells leads to pathological behavior (Coulter and Steinhäuser 2015; Hubbard and Binder n.d.; Rangroo Thrane et al. 2013; Scholl et al. 2009). Three model parameters correspond to homeostasis regulation, involving two mechanisms: the ion exchange capacity between

compartments ( $\epsilon$  and  $\gamma$  parameters in the model), and the maximum capacity of the Na/K pump ( $\rho$  in the model). A variation of  $\epsilon$  corresponds to a degradation of the interaction with glial cells (Coulter and Steinhäuser 2015; Kofuji and Newman 2004; Olsen et al. 2015; Walz 2000) which normally ensures the regulation of the extracellular concentration of  $K^+$ . Homeostasis of intracellular ions is also critical, and a variation of  $\gamma$  corresponds to an impairment of such mechanisms, not detailed in this model, such as co-transporters and exchangers (Hille 2001; Kandel, Eric R., Schwartz James H., Jessell Thomas M. n.d.). Changes in both parameters can also be considered. In the model, they are equivalent to a change in volume while keeping the  $\beta$  ratio constant. Varying the time constants of the slow subsystem ( $\epsilon$  and  $\gamma$ ), leads to different bi-stable behaviors. Two examples are shown in Fig. 4, (b) with  $\gamma = 0.04$ ,  $\epsilon = 0.002$ , (d)  $\gamma = 0.06$ ,  $\epsilon = 0.002$ , and (f)  $\gamma = 0.08$ ,  $\epsilon = 0.0008$ , in these situations the shape of the oscillations of potassium concentration are affected leading to a change in the duration of the events. For burst and SLE shown in Fig4. d and f, the model exhibits a different class of onset bifurcation. For both, a saddle-node on invariant cycle (SNIC) bifurcation at the onset and homoclinic bifurcation at the offset can be identified, thanks to their specific dynamics and resulting shapes (E. Izhikevich 2007; Saggio et al. 2017).

The other key parameter to consider is the pump rate  $\rho$ . The Na/K-ATPase is described by Eq. (8) in the model. In a biological neuron, the pump depends on ATP and during status epilepticus, the ATP concentration augments due to high needs and then decreases (Lietsche et al. 2016). The ATP concentration is not taken into account in the model, but the maximal Na/K-pump rate is modulated by the parameter  $\rho$ . This parameter also influences the shape of  $I_{\text{pump}}$  response as a function of  $[Na]_i$  and  $[K]_o$  (Fig.5a). For large values of  $\rho$ , the pump is activated for lower value of  $[Na]_i$  and  $[K]_o$  (Fig. 5a). We find that burst duration changes with  $\rho$  for a fixed  $[K]_{\text{bath}}$  (Fig. 5b), where a faster activation (higher  $\rho$ ) leads to shorter bursts. The augmentation of  $\rho$  does not necessary lead to an increase of  $I_{\text{pump}}$ ; it affects the general dynamics of the whole system (Fig. 5c).



349

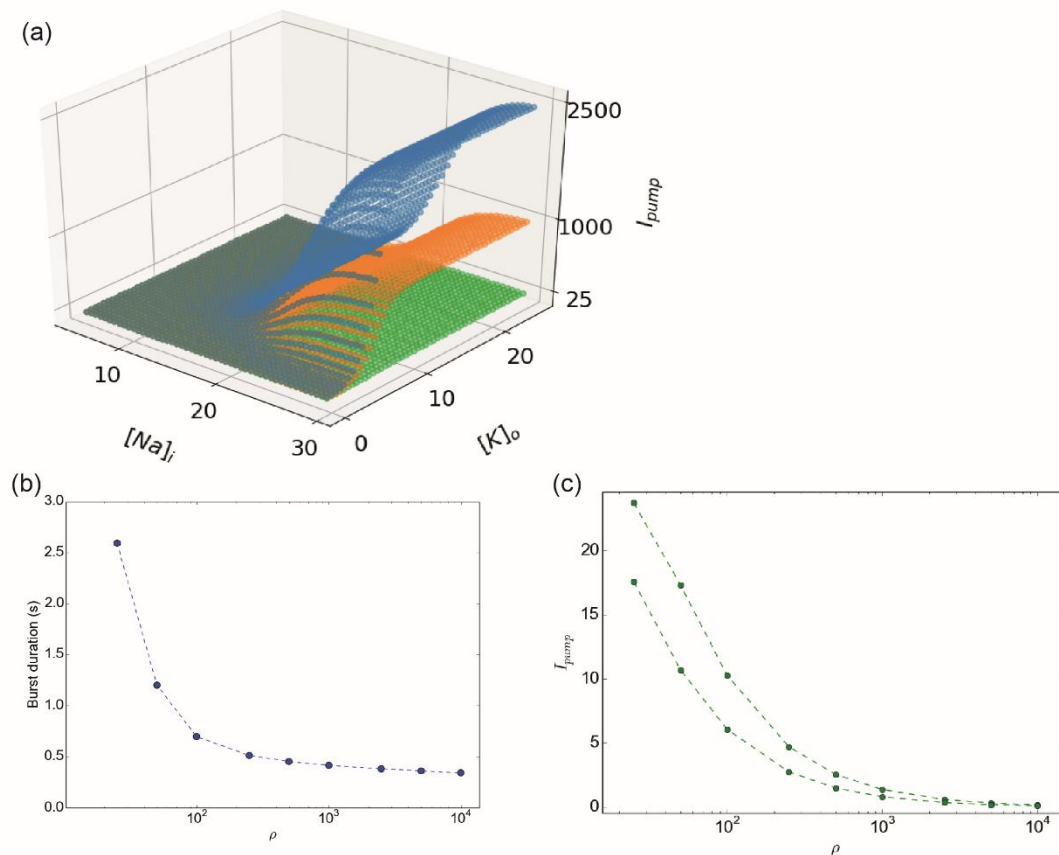

350

351 **Figure 5: Influence of the activity of the Na/K-pump.** (a)  $I_{pump}$  function for  $\rho = 25$  (green),  $\rho =$   
 352 1000 (orange),  $\rho = 2500$  (blue). The initial slope when the system moves away from the  
 353 concentrations at rest is affected, explaining the modification of the influence of  $I_{pump}$  in the  
 354 dynamic of the system. (b) Burst duration as a function of  $\rho$  for  $[K]_{bath} = 14.0$  mM. Bursts have  
 355 shorter durations for higher value of  $\rho$ . (c) Minimal and maximal pump current,  $I_{pump}$ , observed  
 356 during simulation done with  $[K]_{bath} = 14.0$  mM. The range of  $I_{pump}$  decreases for higher  $\rho$  values.

357

358 All these observations show that the model presents a behavior consistent with experimental  
 359 observations. Importantly, the biophysical model is able to reproduce general patterns of  
 360 activities (i.e. periodic events) as generated by the phenomenological model (El Houssaini et  
 361 al. 2015). Phenomenological models, which present a minimal number of variables and  
 362 parameters, allow an exhaustive study of the dynamics. The biophysical model used here  
 363 contains too many parameters for an exhaustive study of the dynamics, but reducing the

number of variables will allow a comparison with the generic model. In the next section, we analyze the dynamics of the model.

## **Dynamical observations**

The model can be divided into the fast ( $V$ ,  $n$ , respectively Eq.1 and Eq.2) and the slow subsystems ( $\Delta[K]_i$ ,  $[K]_g$ , respectively Eq.3 and Eq.3). The slow system can oscillate and drive the fast system between different behaviors, in particular switching between resting state and fast oscillations to obtain bursting-like activity. This type of phenomenon, corresponding to slow fast systems, has been extensively studied from a theoretical point of view, in particular for neural activity (E. Izhikevich 2007; Saggio et al. 2017). In this subsection, to allow a better correspondence with the theoretical framework, we call burster a system allowing these periodic events. To create the oscillation in the slow subsystem, theoretical works show that two mechanisms are possible (E. Izhikevich 2007; Saggio et al. 2017): Slow-Wave (SW) burster, where the slow subsystem is made of two equations, independent of the fast system, or Hysteresis-Loop (HL) burster where the slow subsystem is made of only one equation that depends on the fast system. Each has typical onset/offset bifurcation pairs. These specific paths for bursting have been identified in the generic model (Saggio et al. 2017), and are reproduced in fig.6a. We first verified if the relations between the equations of the slow and fast systems allow the existence of the mechanisms described previously. In our model, two equations describe the slow subsystem (Eq.(3), (4)). Because  $I_K$  (Eq.(6)) depends on  $V$  and  $n$ , the Eq.(3), depends on the fast system. This corresponds to a relation that exists in an HL burster. The second equation of the slow subsystem, Eq.(4), also depends on the Eq.(3), through the Eq. (20). Thus, there exists a relation between the two equations of the slow system, enabling oscillation such as in a SW burster. These relations between the variables of our model allow obtaining the two types of bursters previously described.

We therefore tested for possible correspondences between our model and the generic model. We were able to identify the regions in the generic model capturing the dynamics reproduced by our model in Fig.6a. The center of the region of interest has been marked with

391 a yellow star in fig. 6a. for the generic model and its correspondence in the bifurcation diagram  
 392 of our model in Fig. 6b. In this bifurcation diagram we show two possible paths of our model,  
 393 for burst behavior (Fig. 6b, top) and for SLE (Fig. 6b, bottom). It crosses regions of stable  
 394 resting state (in white), depolarized (red), and bistable (light red). It is therefore possible to  
 395 establish a non-exhaustive list of the correspondences between the paths of the two models.  
 396 The paths for the periodic events have been listed in Fig. 6c. The spike train, Bursting and SLE  
 397 behaviors correspond to paths, c5, c2 and c10, respectively. The bursting behavior with  
 398 changes in  $\epsilon$  and  $\gamma$  (Fig. 4b) that represents the SNIC/SH bifurcation corresponds to the path  
 399 c6. The model proposed here, consistent with biophysics, fits into the framework of the generic  
 400 model.

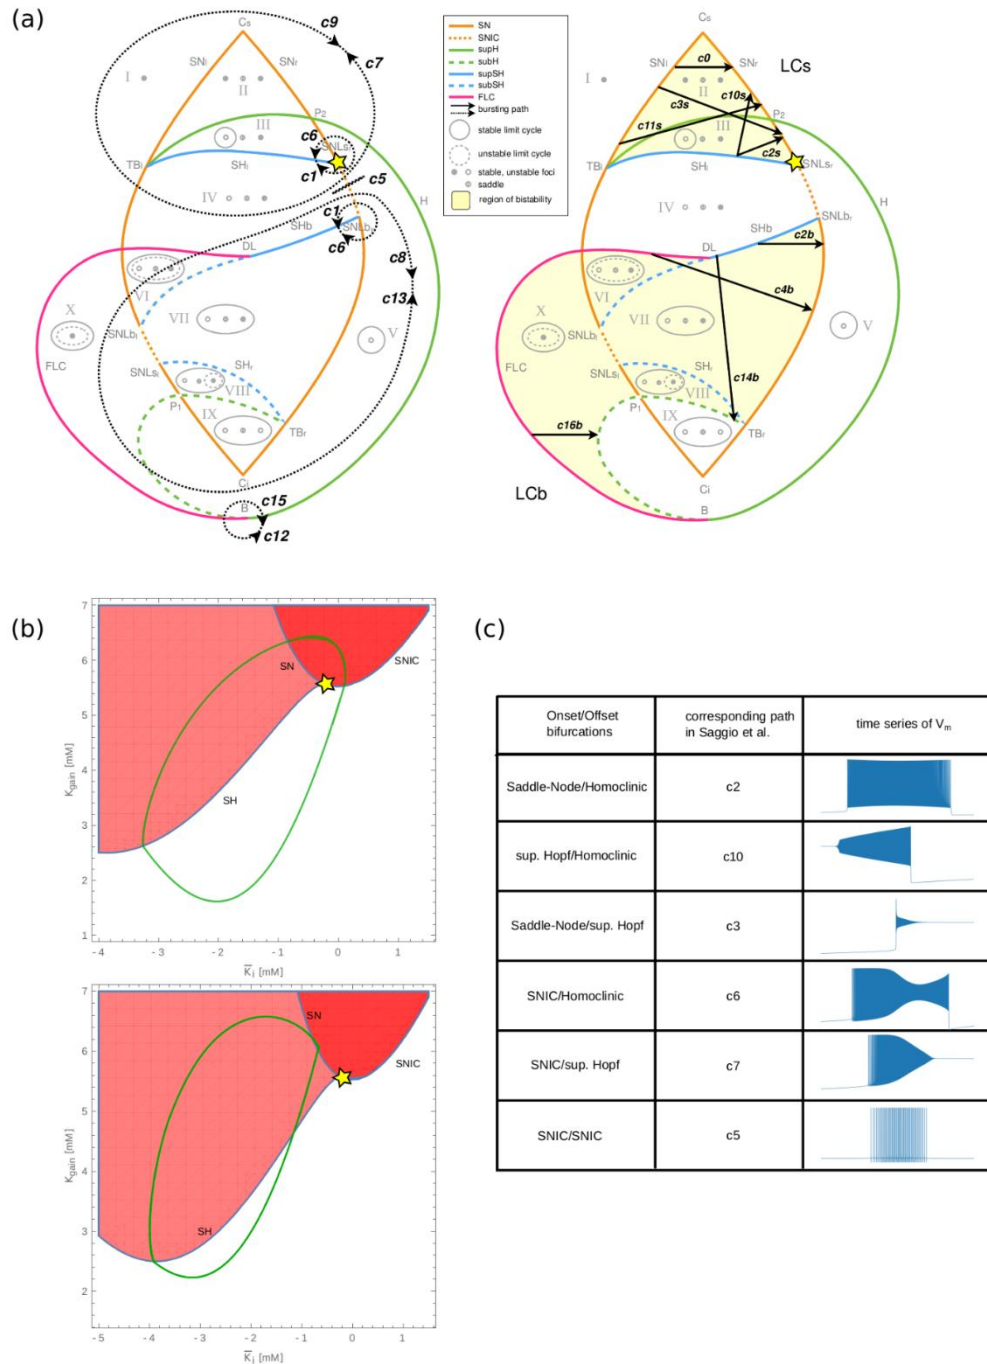

**Figure 6: Comparison with the generic model.** (a) Paths for bursting activity of the generic model proposed by Saggio et al. adapted with authorization from (Saggio et al. 2017), for hysteresis-loop burster (left) and slow-wave burster (right), the yellow star corresponds to the center of the region captured by our model. (b) Bifurcation diagram of our model, where the white area corresponds to 'resting state only' region, the dark red corresponds to a depolarized region, and the light-red region is the region of bi-stability. The yellow star corresponds to the point also found in the generic model, where the SH, SNIC and SN bifurcations intersect. In the top diagram, the green line corresponds to the path taken by the burster, in the bottom one to the path taken by the SLE. (c) Classes of bursters found in the model, and the corresponding path in the generic model.

Since our biophysical model reproduces the bifurcations of the generic model for different types of network activities, it becomes possible to investigate the ionic mechanisms underlying the onset/offset bifurcations. The fast subsystem can be described fixing all parameters (tables 1 and 2) and considering the two slow variables as parameters. Fixed points can thus be found for different values of  $\Delta[K]_i$  and  $[K]_g$  as shown in Fig. 7. Importantly, some parameter values allow a bi-stable behavior. It is thus possible to understand the direct relationship between the biophysical variations in potassium concentration and the type of bifurcations by observing the trajectory of the membrane potential in this space for periodic events identified previously. During periodic oscillatory behavior, the neuron is initially in resting state (blue plane). The membrane potential slowly increases due to the rise in extracellular potassium, until it reaches a SN (green plane) and then encounters a limit cycle. The slow subsystem then drives it to a negative value of  $\Delta[K]_i$ , where the limit cycle meets a SN producing homoclinic bifurcation. These bifurcations are observed at the onset and offset of bursting and SLE behaviors in the model. To have a better understanding of these trajectories, animations with the dynamics of the fast subsystem are available in supplementary material (Fig. S1, S2, S3, S4). We therefore have here a means of bringing together the biophysical aspects, described previously, with the phenomenological vision of dynamical systems approach.

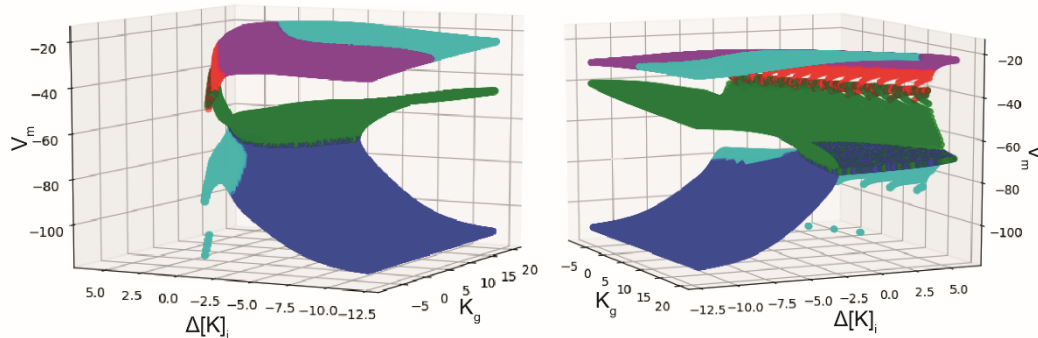

**Figure 7: Fixed points of the fast subsystem.** Fixed point of the fast subsystem ( $V_m$ ) considering the variables from the slow subsystem as parameters. We used a numerical methods with SymPy (Meurer et al. 2017) and SciPy (Millman and Aivazis 2011) libraries, to find the roots and the eigenvalues of the Jacobians of the 2D fast subsystem, and thus the stability considering the existence and the sign of real and imaginary parts of the eigenvalues of the Jacobians. Blue: stable node, green: saddle node, cyan: stable focus, magenta: unstable focus, red: unstable node. Two different angles of view are presented, illustrating the manifold that permits bi-stability.

## Discussion

The aim of this work is to develop a minimal biophysical model at single neuron level based on time scale separation, where the system is able reproduce the dynamics which have been identified in experiments (Bikson et al. 2003; Jirsa et al. 2014; Quilichini et al. 2002; George G. Somjen 2001; Uva et al. 2013) and described by generic models (Jirsa et al. 2014; Saggio et al. 2017). For this purpose, we developed a three-compartment model: a cell equipped with voltage-gated channels to generate action potentials, and  $\text{Na}^+/\text{K}^+$  pump to maintain stable ion concentration, an extracellular space surrounding the cell and an external bath that can uptake/release potassium from/to extracellular space. We managed to describe the interaction between these compartments using a system of four differential equations describing two fast and two slow variables. The fast variables delineate excitability while the slow ones, outline potassium changes from the first and third compartments. The sodium concentration changes are not excluded from our model but are linked to potassium through the electroneutrality principle. We have shown that despite its simplicity the model was able to

454 mimic six electrophysiological behaviors classically recorded in neurons and neuronal  
 455 networks, via the variation of only one parameter. All parameter values were within biophysical  
 456 ranges (Table1) (Hille 2001; Kandel, Eric R., Schwartz James H., Jessell Thomas M. n.d.).  
 457 The model has two main limitations. The fast system describes only intrinsic excitability and  
 458 does not include synaptic currents. And, the slow system is based (only) on potassium  
 459 concentration. Introducing synaptic inputs would increase the dimension of the system. We  
 460 propose that synaptic inputs would act as a noise generator increasing the probability to reach  
 461 the bifurcation as demonstrated experimentally (Jirsa et al. 2014); including them should not  
 462 change the general behavior of the model. Furthermore, ion homeostasis is not reduced solely  
 463 to potassium. Potassium is just one candidate among many others for the slow system.  
 464 Numerous studies have reported large changes in concentration of  $\text{Ca}^{2+}$  (Heinemann et al.  
 465 1986),  $\text{Cl}^-$  (Miles et al. 2012; Raimondo et al. 2015) and neurotransmitters during seizures  
 466 (Chapman et al. 1984; During and Spencer 1993). Likewise, decreasing extracellular  $\text{Ca}^{2+}$   
 467 leads to seizures (Jefferys and Haas 1982), which are characterized by SN/homoclinic  
 468 bifurcations (Jirsa et al. 2014). Since it is possible to trigger similar SLEs via totally different  
 469 biophysical mechanisms (Jirsa et al. 2014), we propose that the  $\text{K}^+$ -dependent mechanism we  
 470 describe, is one among many the possible paths leading to the same end point. In our model,  
 471 changes in potassium constitute the causal factor driving the neuron through different types of  
 472 activities. Although similar changes in potassium are measured experimentally when networks  
 473 (and not cells) undergo such transitions, causality has not been demonstrated experimentally,  
 474 only correlation. Another limitation exists due to the formalism used. If  $[\text{K}]_{\text{bath}}$  tends to zero then  
 475 membrane potential hyperpolarize until the Nernst potential are no longer defined due to  
 476 division by zero. We reach here the limit of the conductance-based model from Hodgkin-  
 477 Huxley formalism. Due to the expression of the Nernst potential, if the ratio  $[\text{K}]_{\text{o}}/[\text{K}]_{\text{i}}$  approaches  
 478 zero, then the  $I_{\text{K}}$  current increases towards infinity, which is not physiologically plausible.  
 479 Another factor to consider is that the dynamics of the single cell is driven by slow changes of  
 480 extracellular variables, which, in a biological system, is shared with neighboring cells. So, these  
 481 slow variables can also be responsible for the genesis of network activity (Naze et al. 2015).



As these mechanisms exist both at the network and single neuron level, it would be simplistic to conclude that a seizure at the network level is due to the combined expression of seizures at the single cell level. Since a neuronal network can be seen as a complex system of many components, coupled in a non-linear manner, seizures may just be an emergent property, perhaps taking advantage of the fact that they are already encoded at the single cell level. The same consideration applies to other pathological activities such as SIA and DB, which corresponding pattern have been found in dynamics of our model.

However, we only studied the dynamics for variations of few chosen parameters based on physiological observations identified in previous works. The parameters explored here show that the model can produce different combinations of onset/offset bifurcations. Numerous studies used ion concentration variations in biophysical models to generate various types of activity (Barreto and Cressman 2011; Bernard et al. 2014; Cressman et al. 2009; Florence et al. 2009; Krishnan et al. 2015; Øyehaug et al. 2012; Yina Wei, Ullah, and Schiff 2014; Yina Wei, Ullah, Ingram, et al. 2014). Descriptions of ion concentration dynamics for bursting have been done by Barreto *et al.* (Barreto and Cressman 2011), based on a slow/fast system. In this work, the bifurcations for SLEs are SNIC and Hopf. This approach, based on ion concentration dynamics, permits the unification of spike, seizure and spreading depression proposed by Wei and al. (Y Wei et al. 2014). As different models can lead to similar dynamics (Prinz et al. 2004), this may suggest that different minimalist models are possible to obtain a unified framework. In our work, we proposed a conductance-based model of the neuronal membrane, exhibiting an extended repertoire of behavior and introducing sustained ictal activity in a unified framework. Another difference with previous work is that our model can exhibit bi-stable modes saddle-node/homoclinic bifurcations, which are the most commonly observed in recordings from patients and experimental animal models (Jirsa et al. 2014). Our model does not take into account variation of volume or oxygen homeostasis as in (Y Wei et al. 2014) but, only variations of ion concentrations, driven by diffusion of potassium from EB. It seems intuitive that other biological variables could be considered as slow variables to drive

the fast subsystem in a reduced biophysical model. The work of Øyehaug *et al.* (Øyehaug *et al.* 2012) presents interesting dynamical features with saddle-node/homoclinic bifurcations for SLEs. However, this model is much more complex as it describes numerous biological features and mechanisms. In comparison to previous works (Barreto and Cressman 2011; Krishnan *et al.* 2015; Øyehaug *et al.* 2012; Yina Wei, Ullah, Ingram, *et al.* 2014), our model is reduced to only four equations. We sought to include only a minimal number of mechanisms necessary to reproduce neural dynamics. Chizhov *et al.* (Chizhov *et al.* 2018) proposed a biophysical model (Epileptor-2) of ictal activities based on the Epileptor (Jirsa *et al.* 2014), using different differential equations. In high potassium conditions, Epileptor-2 produces bursts of bursts, described as ictal-like discharges. However, the most common form of seizure belongs to the saddle-node/homoclinic form, which starts with low voltage fast activity, and ends with bursts slowing down in a logarithmic fashion. The latter was reproduced in the present model, including the period during which neurons stop firing (depolarization block) after seizure onset. Another difference lies in  $K^+$  dynamics. In Epileptor-2, neuronal firing ends when extracellular  $K^+$  returns to baseline level (see Fig 10. in (Chizhov *et al.* 2018)), whereas in the present model, there is a delay, as consistently found experimentally, as a result of glial cell action. This phenomenon in our model can be visualized by observing the evolution of  $[K]_o$  in Fig. 4. Although the Epileptor-2 is not an “intrinsic” Slow/Fast dynamical system, indeed, this model does not describe an independent node as it takes in account the external influence from synaptic inputs from neuronal population. In our model, the observed dynamics, is only due to internal interactions between three compartments.

In conclusion, we developed a biophysical model of a single neuron that, despite its simplicity, is able to generate, in a unified framework, many patterns of neuronal network activity found in experimental recording as well as in generic mathematical models. We show that transition from physiological to paroxysmal activity can be obtained by variation of model parameters relating to ion homeostasis while excitability parameters remained constant. Thus, we proposed a simple biophysical model comparable to generic models (El Houssaini *et al.*

2015; Jirsa et al. 2014; Saggio et al. 2017), offering the possibility of a biological interpretation of observed dynamics. Neuronal networks increase in complexity from flies to humans, but the basic properties of neurons are roughly conserved. The present study shows that acting on an external variable allows single neurons to go through various patterns of activities, which are also found at the network level in the form of seizures, sustained ictal activity and depolarization block (Cunliffe et al. 2015; Jirsa et al. 2014). We propose that they constitute one of the most primitive forms of activities, appearing as soon as neurons are present.

## Materials and Methods

In this project we aim to build a minimal biophysical model that describes different electrophysiological states of a single neuron, the model is schematized in Fig.1. The model describes three compartments: the intracellular space (ICS), the extracellular (ECS) space and the external bath (EB). Parameters chosen correspond to values observed in whole cell recording. The ion exchange between the ICS and the ECS is carried out by the current flowing through the sodium, potassium, and chloride voltage-gated channels (eq.(5),(6) and (7)), and by the sodium-potassium pump generated current (eq.(8)). Parameters values for these currents have identified in (Hamada et al. 2003; Hille 2001; Läuger 1991) and the membrane capacitance in (Golowasch et al. 2009). Passive diffusion of potassium exists (eq.(4)), between EB and ECS. The EB is mimicking the K<sup>+</sup> buffering of vasculature/astrocytes. In ICS and ECS actualization of potassium and sodium concentrations are done (eq.(14)-(20)). The  $\gamma$  parameter has the same unit as the inverse of the Faraday constant, and it is a scaling parameter that permit to include all the mechanisms not detailed in this model which affect the concentration variations (such as co-transporter, exchangers). The values of all the parameters used are given in table 1 and physiological reference and initial values are given in table 2 and table 3.

**Table 1. Parameters values**

| Parameters                        | Symbol                        | Value                   |
|-----------------------------------|-------------------------------|-------------------------|
| Membrane capacitance              | $C_m$                         | 1 nF                    |
| Gating time constant              | $\tau_n$                      | 0.25 ms                 |
| Chloride conductance              | $g_{Cl}$                      | 7.5 nS                  |
| Maximal potassium conductance     | $g_K$                         | 22 nS                   |
| Maximal sodium conductance        | $g_{Na}$                      | 40 nS                   |
| Potassium leak conductance        | $g_{K,l}$                     | 0.12 nS                 |
| Sodium leak conductance           | $g_{Na,l}$                    | 0.02 nS                 |
| Intracellular volume              | $\omega_i$                    | 2160 $\mu m^3$          |
| Extracellular volume              | $\omega_o$                    | 720 $\mu m^3$           |
| Intra/extra cellular volume ratio | $\beta = \omega_i / \omega_o$ | 3                       |
| Conversion factor                 | $\gamma$                      | 0.04 mmole/C. $\mu m^3$ |
| Diffusion time constant           | $\epsilon$                    | 0.001 ms <sup>-1</sup>  |
| Maximal Na/K pump current         | $\rho$                        | 250 pA                  |

**Table 2. Physiological reference values**

|               | Ion          | Concentration |
|---------------|--------------|---------------|
| External bath | $[K]_{bath}$ | [2-30] mM     |
| Extracellular | $[K]_{o,o}$  | 4.8 mM        |
|               | $[Na]_{o,o}$ | 138 mM        |
|               | $[Cl]_{o,o}$ | 112 mM        |
| Intracellular | $[K]_{o,i}$  | 140 mM        |
|               | $[Na]_{o,i}$ | 16 mM         |
|               | $[Cl]_{o,i}$ | 5 mM          |

**Table 3. Initial values**

| Variable      | Initial value     |
|---------------|-------------------|
| $[K]_o$       | $[K]_{o,o}$       |
| $[Na]_o$      | $[Na]_{o,o}$      |
| $[Cl]_o$      | $[Cl]_{o,o}$      |
| $[K]_i$       | $[K]_{o,i}$       |
| $[Na]_i$      | $[Na]_{o,i}$      |
| $[Cl]_i$      | $[Cl]_{o,i}$      |
| $\Delta[K]_i$ | 0                 |
| $[Kg]$        | 0                 |
| $V$           | -70 mV            |
| $n$           | $n_{\infty}(-70)$ |

581

582 The model is a slow-fast dynamical system based on 4 equations. The fast system  
583 describes the membrane potential eq.(1) and potassium conductance gating variable eq.(2).  
584 The slow system describes intracellular potassium concentration variation eq.(3) and  
585 extracellular potassium buffering by external bath eq.(4).

586 (1)  $\frac{dV}{dt} = -\frac{1}{C_m} (I_{Cl} + I_{Na} + I_K + I_{pump})$

587 (2)  $\frac{dn}{dt} = \frac{n_{\infty}(V) - n}{\tau_n}$

588 (3)  $\frac{d\Delta[K]_i}{dt} = -\frac{\gamma}{\omega_i} (I_K - 2 I_{pump})$

589 (4)  $\frac{d[K]_g}{dt} = \varepsilon ([K]_{bath} - [K]_o)$

590

591 With currents:

592 (5)  $I_{Na} = (g_{Na,l} + g_{Na} m_{\infty}(V) h(n)) (V - 26.64 \log(\frac{[Na]_o}{[Na]_i}))$

593 (6)  $I_K = (g_{K,l} + g_K n) (V - 26.64 \log(\frac{[K]_o}{[K]_i}))$

594 (7)  $I_{Cl} = g_{Cl} (V + 26.64 \log(\frac{[Cl]_o}{[Cl]_i}))$

595 (8)  $I_{pump} = \rho \frac{1}{1 + \exp(\frac{1}{2}(21 - [Na]_i))} \frac{1}{1 + \exp(5.5 - [K]_o)}$

596 And conductance variables:

597 (9)  $n_{\infty}(V) = \frac{1}{1 + \exp(\frac{1}{18}(-19 - V))}$

598 (10)  $m_{\infty}(V) = \frac{1}{1 + \exp(\frac{1}{12}(-24 - V))}$

599 (11)  $h(n) = 1.1 - \frac{1}{1 + \exp(-8(n - 0.4))}$

The fast subsystem of the model, (eq. (1)&(2)), is a reduction and simplification of conductance-based models, first describe by Hodgkin–Huxley (HH). From the original publication (Hodgkin, A. L., Huxley 1952) the activation variable of K<sup>+</sup> channels is determined by the equation (eq.12):

$$(12) \quad \frac{dn}{dt} = \alpha_n(1 - n) - \beta_n n$$

Where  $\beta(V)$  and  $\alpha(V)$  are the voltage-dependent rate constants determining the probability of transitions between, respectively, opened and closed state of the ion channel. To simplify the model, we propose to describe the variable  $n$ , through the voltage-dependent parameter  $n_{inf}(V)$  and a constant parameter  $\tau_n$ . In our model,  $n_{inf}(V)$  is the probability to find a channel at open state at a given membrane potential while  $\tau_n$  is the fixed time constant that described the speed for channels to respond to the change of membrane potential. Based on available data in the literature (Bekkers 2000; Hodgkin, A. L., Huxley 1952), and considering that the mean number of channels opened at a given potential is constant, we could qualitatively estimate this relationship (eq.9). In the HH model, the time constant is dependent on the membrane potential due to the formalism used (eq.12). The HH model has been build thanks to experiments done on the squid giant axon, which present differences from on recording of mammals neurons. We compare the  $n_{inf}(V)$  of our model and  $1/\tau(V)$ , and  $n_{inf}(V)$  of the HH model in Fig. 8(a). The shape has been kept from the HH model but starts to increase for lower values of membrane potential. For the voltage-gated sodium channels, variables for opening,  $m$ , and for closing,  $h$ , have been described(Hodgkin, A. L., Huxley 1952). With the same logic, we can consider the percentage of all population of channels opened. But because this is a very fast mechanism (Hille 2001), it can be considered as an instantaneous function of  $V$  (E. Izhikevich 2007) (eq.10). Krinskii and Kokoz (Krinskii,V.I. , Kokoz 1973) showed that  $n(t)+h(t)$  is almost constant, so  $h$  can be considered as a function of  $n$ . Because of the previous modification, we adapted this fitting to obtain the equation of  $h(n)$  (eq.11). Due to these simplifications, the interdependence of gating variables makes the spiking rate dependent on  $\tau$ , as shown in Fig.8(b).

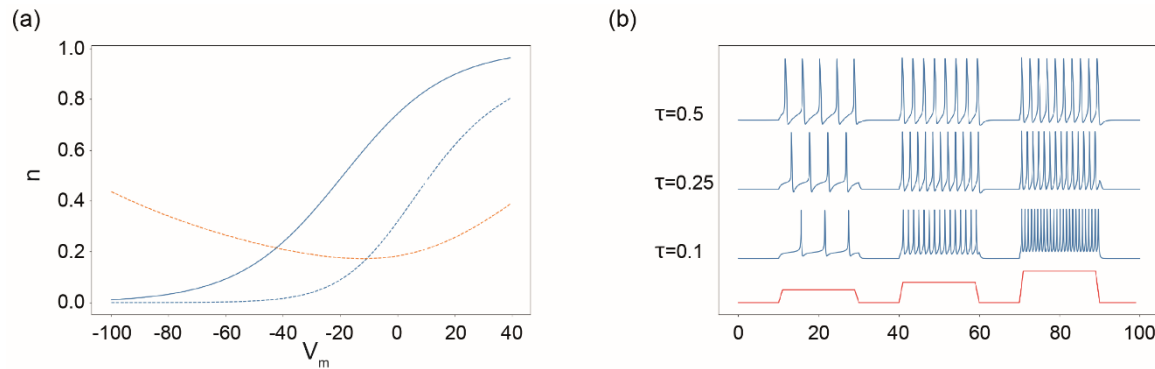

**Figure 8: modification in gating variables.** (a)  $n_{inf}$  of our model in blue, and  $n_{inf}$  and  $1/\tau$  of the Hodgkin-Huxley model respectively in dash blue and red, function of the membrane potential. (b) Response of the fast subsystem of our model to step current stimulation (red) with three different values of  $\tau$  (0.1, 0.25, 0.5 ms). The value of  $\tau$  influence the frequency rate spike for a same injected current.

To be able to take into account concentration variation limiting the number of equations we applied reductions. Inspired by the work of Hübner (Hübner 2015; Hübner and Dahlem 2014), electroneutrality permits the Eq.(13), and so to the Eq.(14). The ratio  $(C_m \gamma)/\omega_i$  is very small ( $<10^{-5}$ ) and so, the right-hand side of Eq.(14) could be considered to be zero. The chloride concentration changes are assumed to be small and regulated by mechanisms which are not described in our model (Doyon et al. 2016). So, in our model, the chloride concentration remains constant.

$$(13) \frac{dV}{dt} = \frac{\omega_i}{C_m \gamma} \left( \frac{d\Delta[K]_i}{dt} + \frac{d\Delta[Na]_i}{dt} + \frac{d\Delta[Cl]_i}{dt} \right)$$

$$(14) \Delta[K]_i + \Delta[Na]_i + \Delta[Cl]_i = \frac{C_m \gamma}{\omega_i} (V - V_0)$$



Thanks to these reductions, concentration variations are calculated as follow:

$$(15) \Delta[N a]_i = -\Delta[K]_i$$

$$(16) \Delta[N a]_o = -\beta \Delta[N a]_i$$

$$(17) \Delta[K]_o = -\beta \Delta[K]_i$$

$$(18) [K]_i = [K]_{0,i} + \Delta[K]_i$$

$$(19) [N a]_i = [N a]_{0,i} + \Delta[N a]_i$$

$$(20) [N a]_o = [N a]_{0,o} + \Delta[N a]_o$$

$$(20) [K]_o = [K]_{0,o} + \Delta[K]_o + [K]_g$$

## Acknowledgement

This research was partially supported by the European Union's Horizon 2020 research and innovation program under grant agreement No. 785907 (SGA2), and No. 945539 (SGA3) Human Brain Project and was also financed in part by the "Coordenação de Aperfeiçoamento de Pessoal de Nível Superior - Brasil (CAPES) - Finance Code 001", the National Research Council "Conselho Nacional de Desenvolvimento Científico e Tecnológico (CNPq)" and the Family Allowance Fund (CAF de Marseille, France).

The authors declare no conflict of interest.

## References

- Barreto, E., & Cressman, J. R. (2011). Ion concentration dynamics as a mechanism for neuronal bursting. *Journal of biological physics*, 37(3), 361–73. <https://doi.org/10.1007/s10867-010-9212-6>
- Bekkers, J. M. (2000). Distribution and activation of voltage-gated potassium channels in cell-attached and outside-out patches from large layer 5 cortical pyramidal neurons of the rat. *The Journal of physiology*, 525 Pt 3(Pt 3), 611–20. <https://doi.org/10.1111/J.1469-7793.2000.T01-2-00611.X>
- Bernard, C., Naze, S., Proix, T., & Jirsa, V. K. (2014). Modern concepts of seizure modeling. *International review of neurobiology*, 114, 121–53. <https://doi.org/10.1016/B978-0-12-418693-4.00006-6>
- Bikson, M., Hahn, P. J., Fox, J. E., & Jefferys, J. G. R. (2003). Depolarization Block of Neurons During Maintenance of Electrographic Seizures. *Journal of Neurophysiology*, 90(4), 2402–2408. <https://doi.org/10.1152/jn.00467.2003>
- Blenkinsop, A., Valentin, A., Richardson, M. P., & Terry, J. R. (2012). The dynamic evolution of focal-onset epilepsies - combining theoretical and clinical observations. *European Journal of Neuroscience*, 36(2), 2188–2200. <https://doi.org/10.1111/j.1460-9568.2012.08082.x>
- Bragin, A., Penttonen, M., & Buzsáki, G. (1997). Termination of epileptic afterdischarge in the hippocampus. *The Journal of neuroscience : the official journal of the Society for Neuroscience*, 17(7), 2567–79. <http://www.ncbi.nlm.nih.gov/pubmed/9065516>. Accessed 20 January 2019
- Chapman, A. G., Westerberg, E., Premachandra, M., & Meldrum, B. S. (1984). Changes in Regional Neurotransmitter Amino Acid Levels in Rat Brain During Seizures Induced by l-Allylglycine, Bicuculline, and Kainic Acid. *Journal of Neurochemistry*, 43(1), 62–70. <https://doi.org/10.1111/j.1471-4159.1984.tb06679.x>
- Chizhov, A. V., Zefirov, A. V., Amakhin, D. V., Smirnova, E. Y., & Zaitsev, A. V. (2018). Minimal model of interictal and ictal discharges “Epileptor-2.” *PLOS Computational Biology*, 14(5), e1006186. <https://doi.org/10.1371/journal.pcbi.1006186>
- Coulter, D. A., & Steinhäuser, C. (2015). Role of astrocytes in epilepsy. *Cold Spring Harbor perspectives in medicine*, 5(3), a022434. <https://doi.org/10.1101/cshperspect.a022434>
- Cressman, J. R., Ullah, G., Ziburkus, J., Schiff, S. J., & Barreto, E. (2009). The influence of sodium and potassium dynamics on excitability, seizures, and the stability of persistent states: I. Single neuron dynamics. *Journal of Computational Neuroscience*, 26(2), 159–170. <https://doi.org/10.1007/s10827-008-0132-4>
- Cunliffe, V. T., Baines, R. A., Giachello, C. N. G., Lin, W. H., Morgan, A., Reuber, M., et al. (2015). Epilepsy research methods update: Understanding the causes of epileptic seizures and identifying new treatments using non-mammalian model organisms. *Seizure*. W.B. Saunders Ltd. <https://doi.org/10.1016/j.seizure.2014.09.018>
- de Almeida, A.-C. G., Rodrigues, A. M., Scorza, F. A., Cavalheiro, E. A., Teixeira, H. Z., Duarte, M. A., et al. (2008). Mechanistic hypotheses for nonsynaptic epileptiform activity induction and its transition from the interictal to ictal state-Computational simulation. *Epilepsia*, 49(11), 1908–1924. <https://doi.org/10.1111/j.1528-1167.2008.01686.x>
- de Curtis, M., Uva, L., Gnatkovsky, V., & Librizzi, L. (2018). Potassium dynamics and seizures: Why is potassium ictogenic? *Epilepsy Research*, 143, 50–59.

713 <https://doi.org/10.1016/j.eplepsyres.2018.04.005>

714 Doyon, N., Vinay, L., Prescott, S. A., & De Koninck, Y. (2016). Chloride Regulation: A Dynamic  
715 Equilibrium Crucial for Synaptic Inhibition. *Neuron*, 89(6), 1157–1172.  
716 <https://doi.org/10.1016/j.neuron.2016.02.030>

717 Dubyak, G. R. (2004). Ion homeostasis, channels, and transporters: an update on cellular  
718 mechanisms. *Advances in Physiology Education*, 28(4), 143–154.  
719 <https://doi.org/10.1152/advan.00046.2004>

720 Durand, D. M., Park, E.-H., & Jensen, A. L. (2010). Potassium diffusive coupling in neural networks.  
721 *Philosophical transactions of the Royal Society of London. Series B, Biological sciences*,  
722 365(1551), 2347–62. <https://doi.org/10.1098/rstb.2010.0050>

723 During, M. J., & Spencer, D. D. (1993). Extracellular hippocampal glutamate and spontaneous seizure  
724 in the conscious human brain. *The Lancet*, 341(8861), 1607–1610.  
725 [https://doi.org/10.1016/0140-6736\(93\)90754-5](https://doi.org/10.1016/0140-6736(93)90754-5)

726 El Houssaini, K., Ivanov, A. I., Bernard, C., & Jirsa, V. K. (2015). Seizures, refractory status epilepticus,  
727 and depolarization block as endogenous brain activities. *Physical Review E*, 91(1), 010701.  
728 <https://doi.org/10.1103/PhysRevE.91.010701>

729 Fisher, R. S., Pedley, T. A., Moody, W. J., & Prince, D. A. (1976). The role of extracellular potassium in  
730 hippocampal epilepsy. *Archives of neurology*, 33(2), 76–83.  
731 <http://www.ncbi.nlm.nih.gov/pubmed/1252153>. Accessed 12 January 2019

732 Florence, G., Dahlem, M. A., Almeida, A.-C. G., Bassani, J. W. M., & Kurths, J. (2009). The role of  
733 extracellular potassium dynamics in the different stages of ictal bursting and spreading  
734 depression: A computational study. *Journal of Theoretical Biology*, 258(2), 219–228.  
735 <https://doi.org/10.1016/j.jtbi.2009.01.032>

736 Fröhlich, F., Bazhenov, M., Iragui-Madoz, V., & Sejnowski, T. J. (2008). Potassium dynamics in the  
737 epileptic cortex: new insights on an old topic. *The Neuroscientist : a review journal bringing*  
738 *neurobiology, neurology and psychiatry*, 14(5), 422–33.  
739 <https://doi.org/10.1177/1073858408317955>

740 Gloveli, T., Albrecht, D., & Heinemann, U. (1995). Properties of low Mg<sup>2+</sup> induced epileptiform  
741 activity in rat hippocampal and entorhinal cortex slices during adolescence. *Brain research.*  
742 *Developmental brain research*, 87(2), 145–52. <http://www.ncbi.nlm.nih.gov/pubmed/7586496>.  
743 Accessed 19 January 2019

744 Golowasch, J., Thomas, G., Taylor, A. L., Patel, A., Pineda, A., Khalil, C., & Nadim, F. (2009). Membrane  
745 capacitance measurements revisited: Dependence of capacitance value on measurement  
746 method in nonisopotential neurons. *Journal of Neurophysiology*, 102(4), 2161–2175.  
747 <https://doi.org/10.1152/jn.00160.2009>

748 Haglund, M. M., & Schwartzkroin, P. A. (1990). Role of Na-K pump potassium regulation and IPSPs in  
749 seizures and spreading depression in immature rabbit hippocampal slices. *Journal of*  
750 *neurophysiology*, 63(2), 225–39. <https://doi.org/10.1152/jn.1990.63.2.225>

751 Hamada, K., Matsuura, H., Sanada, M., Toyoda, F., Omatsu-Kanbe, M., Kashiwagi, A., & Yasuda, H.  
752 (2003). Properties of the Na<sup>+</sup>/K<sup>+</sup> pump current in small neurons from adult rat dorsal root  
753 ganglia. *British Journal of Pharmacology*, 138(8), 1517–1527.  
754 <https://doi.org/10.1038/sj.bjp.0705170>

755 Heinemann, U., Konnerth, A., Pumain, R., & Wadman, W. J. (1986). Extracellular calcium and  
756 potassium concentration changes in chronic epileptic brain tissue. *Advances in neurology*, 44,

641–61. <http://www.ncbi.nlm.nih.gov/pubmed/3518350>. Accessed 23 January 2019

Hille, B. (2001). *Ion channels of excitable membranes*. Sinauer.  
<https://global.oup.com/ushe/product/ion-channels-of-excitable-membranes-9780878933211?cc=us&lang=en&#>. Accessed 13 January 2019

Hodgkin, A. L., Huxley, F. (1952). A quantitative description of membrane current and its application to conduction and excitation in nerve. *J Physiol*, 117(4), 500–544.

Holt, A. B., & Netoff, T. I. (2013). Computational modeling of epilepsy for an experimental neurologist. *Experimental neurology*, 244, 75–86.  
<https://doi.org/10.1016/j.expneurol.2012.05.003>

Houssaini, K. El, Bernard, C., & Jirsa, V. K. (2020). The epileptor model: A systematic mathematical analysis linked to the dynamics of seizures, refractory status epilepticus, and depolarization block. *eNeuro*, 7(2). <https://doi.org/10.1523/ENEURO.0485-18.2019>

Hubbard, J. A., & Binder, D. K. (n.d.). *Astrocytes and epilepsy*.

Hübner, N. (2015). *Local dynamics of ion based neuron models for cortical spreading depression, stroke and seizures*. Technische Universität Berlin, Fakultät II - Mathematik und Naturwissenschaften.

Hübner, N., & Dahlem, M. A. (2014). Dynamics from Seconds to Hours in Hodgkin-Huxley Model with Time-Dependent Ion Concentrations and Buffer Reservoirs. *PLoS Computational Biology*, 10(12), e1003941. <https://doi.org/10.1371/journal.pcbi.1003941>

Izhikevich, E. (2007). *Dynamical Systems In Neuroscience : The Geometry of Excitability and Bursting*. MIT Press.

Izhikevich, E. M. (2000). *NEURAL EXCITABILITY, SPIKING AND BURSTING. Tutorials and Reviews International Journal of Bifurcation and Chaos* (Vol. 10). <http://math.la.asu.edu/>. Accessed 13 January 2019

Jefferys, J. G., & Haas, H. L. (1982). Synchronized bursting of CA1 hippocampal pyramidal cells in the absence of synaptic transmission. *Nature*, 300(5891), 448–50.  
<http://www.ncbi.nlm.nih.gov/pubmed/6292731>. Accessed 13 January 2019

Jirsa, Stacey, Quilichini, P. P., Ivanov, A. I., & Bernard, C. (2014). On the nature of seizure dynamics. *Brain : a journal of neurology*, 137(Pt 8), 2210–30. <https://doi.org/10.1093/brain/awu133>

Jirsa, V.K., Proix, T., Perdikis, D., Woodman, M. M., Wang, H., Gonzalez-Martinez, J., et al. (2017). The Virtual Epileptic Patient: Individualized whole-brain models of epilepsy spread. *NeuroImage*, 145, 377–388. <https://doi.org/10.1016/J.NEUROIMAGE.2016.04.049>

Jirsa, Viktor K., & Stefanescu, R. A. (2011). Neural Population Modes Capture Biologically Realistic Large Scale Network Dynamics. *Bulletin of Mathematical Biology*, 73(2), 325–343.  
<https://doi.org/10.1007/s11538-010-9573-9>

Kager, H., Wadman, W. J., & Somjen, G. G. (2000). Simulated Seizures and Spreading Depression in a Neuron Model Incorporating Interstitial Space and Ion Concentrations. *Journal of Neurophysiology*, 84(1), 495–512. <https://doi.org/10.1152/jn.2000.84.1.495>

Kandel, Eric R., Schwartz James H., Jessell Thomas M., al. (n.d.). *Principles of neural science*.

Katayama, Y., Becker, D. P., Tamura, T., & Hovda, D. A. (1990). Massive increases in extracellular potassium and the indiscriminate release of glutamate following concussive brain injury. *Journal of Neurosurgery*, 73(6), 889–900. <https://doi.org/10.3171/jns.1990.73.6.0889>

Kim, C. M., & Nykamp, D. Q. (2017). The influence of depolarization block on seizure-like activity in

799 networks of excitatory and inhibitory neurons. *Journal of Computational Neuroscience*, 43(1),  
800 65–79. <https://doi.org/10.1007/s10827-017-0647-7>

801 Kofuji, P., & Newman, E. A. (2004). Potassium buffering in the central nervous system. *Neuroscience*,  
802 129(4), 1045–56. <https://doi.org/10.1016/j.neuroscience.2004.06.008>

803 Krinskii, V. I., Kokoz, Y. M. (1973). Analysis of equations of excitable membranes-I. Reduction of the  
804 Hodgkin-Huxley equations to a second order system. *Biophysica*, 18, 533–539.  
805 [https://www.researchgate.net/publication/279566216\\_Analysis\\_of\\_equations\\_of\\_excitable\\_m](https://www.researchgate.net/publication/279566216_Analysis_of_equations_of_excitable_membranes-I_Reduction_of_the_Hodgkin-Huxley_equations_to_a_second_order_system)  
806 [embranes-I\\_Reduction\\_of\\_the\\_Hodgkin-Huxley\\_equations\\_to\\_a\\_second\\_order\\_system](https://www.researchgate.net/publication/279566216_Analysis_of_equations_of_excitable_membranes-I_Reduction_of_the_Hodgkin-Huxley_equations_to_a_second_order_system).  
807 Accessed 13 January 2019

808 Krishnan, G. P., Filatov, G., Shilnikov, A., & Bazhenov, M. (2015). Electrogenic properties of the Na<sup>+</sup>/K<sup>+</sup>  
809 ATPase control transitions between normal and pathological brain states. *Journal of*  
810 *neurophysiology*, 113(9), 3356–74. <https://doi.org/10.1152/jn.00460.2014>

811 Läuger, P. (Peter). (1991). *Electrogenic ion pumps*. Sinauer Associates.

812 Lietsche, J., Imran, I., & Klein, J. (2016). Extracellular levels of ATP and acetylcholine during lithium-  
813 pilocarpine induced status epilepticus in rats. *Neuroscience Letters*, 611, 69–73.  
814 <https://doi.org/10.1016/j.neulet.2015.11.028>

815 Lowenstein, D. H. (2009). Epilepsy after head injury: An overview. *Epilepsia*, 50, 4–9.  
816 <https://doi.org/10.1111/j.1528-1167.2008.02004.x>

817 Lux, H. D., Heinemann, U., & Dietzel, I. (1986). Ionic changes and alterations in the size of the  
818 extracellular space during epileptic activity. *Advances in neurology*, 44, 619–39.  
819 <http://www.ncbi.nlm.nih.gov/pubmed/3518349>. Accessed 14 January 2019

820 Lytton, W. W. (2008). Computer modelling of epilepsy. *Nature reviews. Neuroscience*, 9(8), 626–37.  
821 <https://doi.org/10.1038/nrn2416>

822 McCormick, D. A., & Contreras, D. (2001). On The Cellular and Network Bases of Epileptic Seizures.  
823 *Annual Review of Physiology*, 63(1), 815–846. <https://doi.org/10.1146/annurev.physiol.63.1.815>

824 Merricks, E. M., Smith, E. H., McKhann, G. M., Goodman, R. R., Bateman, L. M., Emerson, R. G., et al.  
825 (2015). Single unit action potentials in humans and the effect of seizure activity. *Brain : a*  
826 *journal of neurology*, 138(Pt 10), 2891–906. <https://doi.org/10.1093/brain/awv208>

827 Meurer, A., Smith, C. P., Paprocki, M., Čertík, O., Kirpichev, S. B., Rocklin, M., et al. (2017). SymPy:  
828 symbolic computing in Python. *PeerJ Computer Science*, 3, e103. [https://doi.org/10.7717/peerj-](https://doi.org/10.7717/peerj-cs.103)  
829 [cs.103](https://doi.org/10.7717/peerj-cs.103)

830 Miles, R., Blaesse, P., Huberfeld, G., Wittner, L., & Kaila, K. (2012). *Chloride homeostasis and GABA*  
831 *signaling in temporal lobe epilepsy. Jasper's Basic Mechanisms of the Epilepsies*. National Center  
832 for Biotechnology Information (US). <http://www.ncbi.nlm.nih.gov/pubmed/22787654>. Accessed  
833 23 January 2019

834 Millman, K. J., & Aivazis, M. (2011). Python for Scientists and Engineers. *Computing in Science &*  
835 *Engineering*, 13(2), 9–12. <https://doi.org/10.1109/MCSE.2011.36>

836 Montbrió, E., Pazó, D., & Roxin, A. (2015). Macroscopic Description for Networks of Spiking Neurons.  
837 *Physical Review X*, 5(2), 021028. <https://doi.org/10.1103/PhysRevX.5.021028>

838 Naze, S. (2015). Multiscale Computational Modeling of Epileptic Seizures : from macro to microscopic  
839 dynamics. [Http://Www.Theses.Fr](http://www.Theses.Fr). <https://www.theses.fr/2015AIXM4023>

840 Naze, S., Bernard, C., & Jirsa, V. (2015). Computational Modeling of Seizure Dynamics Using Coupled



841        Neuronal Networks: Factors Shaping Epileptiform Activity. *PLOS Computational Biology*, 11(5),  
842        e1004209. <https://doi.org/10.1371/journal.pcbi.1004209>

843        Olsen, M. L., Khakh, B. S., Skatchkov, S. N., Zhou, M., Lee, C. J., & Rouach, N. (2015). New Insights on  
844        Astrocyte Ion Channels: Critical for Homeostasis and Neuron-Glia Signaling. *The Journal of*  
845        *neuroscience : the official journal of the Society for Neuroscience*, 35(41), 13827–35.  
846        <https://doi.org/10.1523/JNEUROSCI.2603-15.2015>

847        Øyehaug, L., Østby, I., Lloyd, C. M., Omholt, S. W., & Einevoll, G. T. (2012). Dependence of  
848        spontaneous neuronal firing and depolarisation block on astroglial membrane transport  
849        mechanisms. *Journal of Computational Neuroscience*, 32(1), 147–165.  
850        <https://doi.org/10.1007/s10827-011-0345-9>

851        Prinz, A. A., Bucher, D., & Marder, E. (2004). Similar network activity from disparate circuit  
852        parameters. *Nature Neuroscience*, 7(12), 1345–1352. <https://doi.org/10.1038/nn1352>

853        Proix, T., Bartolomei, F., Chauvel, P., Bernard, C., & Jirsa, V. K. (2014). Permittivity Coupling across  
854        Brain Regions Determines Seizure Recruitment in Partial Epilepsy. *Journal of Neuroscience*,  
855        34(45), 15009–15021. <https://doi.org/10.1523/JNEUROSCI.1570-14.2014>

856        Quilichini, P. P., Diabira, D., Chiron, C., Ben-Ari, Y., & Gozlan, H. (2002). Persistent epileptiform  
857        activity induced by low Mg<sup>2+</sup> in intact immature brain structures. *The European journal of*  
858        *neuroscience*, 16(5), 850–60. <http://www.ncbi.nlm.nih.gov/pubmed/12372021>. Accessed 19  
859        January 2019

860        Raimondo, J. V., Burman, R. J., Katz, A. A., & Akerman, C. J. (2015). Ion dynamics during seizures.  
861        *Frontiers in Cellular Neuroscience*, 9, 419. <https://doi.org/10.3389/FNCEL.2015.00419>

862        Rangroo Thrane, V., Thrane, A. S., Wang, F., Cotrina, M. L., Smith, N. A., Chen, M., et al. (2013).  
863        Ammonia triggers neuronal disinhibition and seizures by impairing astrocyte potassium  
864        buffering. *Nature medicine*, 19(12), 1643–8. <https://doi.org/10.1038/nm.3400>

865        Reinert, M., Khaldi, A., Zauner, A., Doppenberg, E., Choi, S., & Bullock, R. (2000). High extracellular  
866        potassium and its correlates after severe head injury: relationship to high intracranial pressure.  
867        *Neurosurgical focus*, 8(1), e10. <http://www.ncbi.nlm.nih.gov/pubmed/16924778>. Accessed 13  
868        January 2019

869        Saggio, M. L., Crisp, D., Scott, J. M., Karoly, P., Kuhlmann, L., Nakatani, M., et al. (2020). A taxonomy  
870        of seizure dynamotypes. *eLife*, 9. <https://doi.org/10.7554/eLife.55632>

871        Saggio, M. L., Spiegler, A., Bernard, C., & Jirsa, V. K. (2017). Fast-Slow Bursters in the Unfolding of a  
872        High Codimension Singularity and the Ultra-slow Transitions of Classes. *Journal of mathematical*  
873        *neuroscience*, 7(1), 7. <https://doi.org/10.1186/s13408-017-0050-8>

874        Scholl, U. I., Choi, M., Liu, T., Ramaekers, V. T., Häusler, M. G., Grimmer, J., et al. (2009). Seizures,  
875        sensorineural deafness, ataxia, mental retardation, and electrolyte imbalance (SeSAME  
876        syndrome) caused by mutations in KCNJ10. *Proceedings of the National Academy of Sciences of*  
877        *the United States of America*, 106(14), 5842–7. <https://doi.org/10.1073/pnas.0901749106>

878        Soltesz, I., & Staley, K. (2008). *Computational neuroscience in epilepsy*. Academic.  
879        <http://booksdescr.org/ads.php?md5=4430D0D436850CEFEB6D8A23B267E8BB>. Accessed 19  
880        January 2019

881        Somjen, G G. (2001). Mechanisms of spreading depression and hypoxic spreading depression-like  
882        depolarization. *Physiological reviews*, 81(3), 1065–96.  
883        <https://doi.org/10.1152/physrev.2001.81.3.1065>

- 884 Somjen, George G. (2001). Mechanisms of Spreading Depression and Hypoxic Spreading Depression-  
885 Like Depolarization. *Physiological Reviews*, 81(3), 1065–1096.  
886 <https://doi.org/10.1152/physrev.2001.81.3.1065>
- 887 Staley, K. (2015). Molecular mechanisms of epilepsy. *Nature neuroscience*, 18(3), 367–72.  
888 <https://doi.org/10.1038/nn.3947>
- 889 Stefanescu, R. A., Shivakeshavan, R. G., & Talathi, S. S. (2012, December 1). Computational models of  
890 epilepsy. *Seizure*. W.B. Saunders. <https://doi.org/10.1016/j.seizure.2012.08.012>
- 891 Tankus, A. (2016). Exploring human epileptic activity at the single-neuron level. *Epilepsy & Behavior*,  
892 58, 11–17. <https://doi.org/10.1016/j.yebeh.2016.02.014>
- 893 Traub, R. D., & Wong, R. K. (1982). Cellular mechanism of neuronal synchronization in epilepsy.  
894 *Science (New York, N.Y.)*, 216(4547), 745–7. <http://www.ncbi.nlm.nih.gov/pubmed/7079735>.  
895 Accessed 23 January 2019
- 896 Traynelis, S. F., & Dingledine, R. (1988). Potassium-induced spontaneous electrographic seizures in  
897 the rat hippocampal slice. *Journal of Neurophysiology*, 59(1), 259–276.  
898 <https://doi.org/10.1152/jn.1988.59.1.259>
- 899 Traynelis, Stephen F., & Dingledine, R. (1989). Modification of potassium-induced interictal bursts  
900 and electrographic seizures by divalent cations. *Neuroscience Letters*, 98(2), 194–199.  
901 [https://doi.org/10.1016/0304-3940\(89\)90509-0](https://doi.org/10.1016/0304-3940(89)90509-0)
- 902 Truccolo, W., Donoghue, J. A., Hochberg, L. R., Eskandar, E. N., Madsen, J. R., Anderson, W. S., et al.  
903 (2011). Single-neuron dynamics in human focal epilepsy. *Nature neuroscience*, 14(5), 635–41.  
904 <https://doi.org/10.1038/nn.2782>
- 905 Ullah, G., & Schiff, S. J. (2010). Assimilating seizure dynamics. *PLoS computational biology*, 6(5),  
906 e1000776. <https://doi.org/10.1371/journal.pcbi.1000776>
- 907 Uva, L., Trombin, F., Carriero, G., Avoli, M., & de Curtis, M. (2013). Seizure-like discharges induced by  
908 4-aminopyridine in the olfactory system of the in vitro isolated guinea pig brain. *Epilepsia*,  
909 54(4), 605–15. <https://doi.org/10.1111/epi.12133>
- 910 Walz, W. (2000). Role of astrocytes in the clearance of excess extracellular potassium.  
911 *Neurochemistry international*, 36(4–5), 291–300.  
912 <http://www.ncbi.nlm.nih.gov/pubmed/10732996>. Accessed 13 January 2019
- 913 Wang, L., Dufour, S., Valiante, T. A., & Carlen, P. L. (2016). Extracellular Potassium and Seizures:  
914 Excitation, Inhibition and the Role of Ih. *International Journal of Neural Systems*, 26(08),  
915 1650044. <https://doi.org/10.1142/S0129065716500441>
- 916 Wang, Y., Trevelyan, A. J., Valentin, A., Alarcon, G., Taylor, P. N., & Kaiser, M. (2017). Mechanisms  
917 underlying different onset patterns of focal seizures. *PLOS Computational Biology*, 13(5),  
918 e1005475. <https://doi.org/10.1371/journal.pcbi.1005475>
- 919 Wei, Y, Ullah, G., & Schiff, S. J. (2014). Unification of neuronal spikes, seizures, and spreading  
920 depression. *J. Neurosci.*, 34(35), 11733–11743.
- 921 Wei, Yina, Ullah, G., Ingram, J., & Schiff, S. J. (2014). Oxygen and seizure dynamics: II. Computational  
922 modeling. *Journal of neurophysiology*, 112(2), 213–23. <https://doi.org/10.1152/jn.00541.2013>
- 923 Wei, Yina, Ullah, G., & Schiff, S. J. (2014). Unification of Neuronal Spikes, Seizures, and Spreading  
924 Depression. *Journal of Neuroscience*, 34(35), 11733–11743.  
925 <https://doi.org/10.1523/JNEUROSCI.0516-14.2014>



Wendling, F., Benquet, P., Bartolomei, F., & Jirsa, V. (2016). Computational models of epileptiform activity. *Journal of Neuroscience Methods*, 260, 233–251.  
<https://doi.org/10.1016/J.JNEUMETH.2015.03.027>

## Supporting information

**S1 Animation. Dynamics of the membrane potential during burst.** Considering the two slow variables as parameters of the fast subsystem, fixed point has been found: blue: stable node, green: saddle node, cyan: stable focus, magenta: unstable focus, red: unstable node. The system starts at a stable fixed point and is slowly driven to cross a saddle-node and then follow a limit cycle, until it cross again a saddle-node (creating the Homoclinic bifurcation), and go back to a stable fixed point.

**S2 Animation. Dynamic during Burst observed in the phase plane.** The  $n$  nullcline (blue line) and the  $V$  nullcline (blue points) solved numerically. The system starts at a stable fixed point and is slowly driven to cross a saddle-node and then follow a limit cycle, until it cross again a saddle-node (creating the Homoclinic bifurcation), and go back to a stable fixed point.

**S3 Animation. Dynamics of the membrane potential during SLEs.** Considering the two slow variables as parameters of the fast subsystem, fixed point has been found: blue: stable node, green: saddle node, cyan: stable focus, magenta: unstable focus, red: unstable node. The system starts at a stable fixed point and is slowly driven to cross a saddle-node and then follow a limit cycle, it cross successively two Hopf bifurcations to come back to a limit cycle until it cross again a saddle-node (creating the Homoclinic bifurcation), and go back to a stable fixed point.

**S4 Animation. Dynamic during SLEs observed in the phase plane.** The  $n$  nullcline (blue line) and the  $V$  nullcline (blue points) solved numerically the system start at a stable fixed point and is slowly driven to cross a saddle-node and then follow a limit cycle, it cross successively two Hopf bifurcations to come back to a limit cycle until it cross again a saddle-node (creating the Homoclinic bifurcation), and go back to a stable fixed point.
